# Supplementary material for: Simultaneous Analysis of Bacterial and Fungal Communities in Oral Samples from Intubated Patients in Intensive Care Unit
Source: MDPI journal article supplement (doi:10.3390/diagnostics13101784), 2023-05-18
Supplement: s1 [file s1]

## Supplementary Table

**Table S1. Characterization of intubated subjects under mechanical ventilation**

| Subject | Age | Sex | Underlying disease                   | Initial Antibiotics     |
|---------|-----|-----|--------------------------------------|-------------------------|
| #pt-01  | 81  | M   | COPD*, Alcoholic hepatitis, Diabetes | Piperacillin-Tazobactam |
| #pt-02  | 71  | M   | Lung Cancer, Renal Cell Cancer       | Meropenem               |
| #pt-03  | 67  | M   | Alcoholic Hepatitis                  | Ertapenem               |
| #pt-04  | 65  | M   | Diabetes, COPD*                      | Piperacillin-Tazobactam |

\* COPD: Chronic obstructive pulmonary disease

**Table S2. Primers for quantification of bacteria and *Candida albicans*.**

| Primer                            | Sequence (5' – 3')       |
|-----------------------------------|--------------------------|
| <i>Acinetobacter baumannii</i>    |                          |
| <b>Abau1</b>                      | GGCTTATTAAGTCGGATGTG     |
| <b>Abau2</b>                      | ACCTCAGCGTCAGTATTAG      |
| <i>Pseudomonas aeruginosa</i>     |                          |
| <b>Psae1</b>                      | TTCAGCAAGTTGGATGTG       |
| <b>Psae2</b>                      | CCTCAGTGTCAGTATCAGT      |
| <i>Staphylococcus aureus</i>      |                          |
| <b>Saur1</b>                      | TGCATTAGCTAGTTGGTAAG     |
| <b>Saur2</b>                      | ATATGTTCTTCCCTAATAACAGAG |
| <i>Staphylococcus epidermidis</i> |                          |
| <b>Sepi1</b>                      | CCGCATTAGCTAGTTGGTA      |
| <b>Sepi2</b>                      | CTTACACATTTGTTCTTCCCTA   |
| <i>Candida albicans</i>           |                          |
| <b>Calb1</b>                      | TTTATCAACTTGTCACACCAGA   |
| <b>Calb2</b>                      | ATCCCGCCTTACCACTACCG     |
| 16S rRNA                          |                          |
| <b>16S_1</b>                      | CCTACGGGAGGCAGCAG        |
| <b>16S_2</b>                      | ATTACCGCGGCTGCTGGCA      |
